# Supplementary material for: External electric field driven conformation transition between lithium salts and electride-like molecules: intriguing NLO switches in Li@corannulene
Source: Royal Society of Chemistry journal article supplement (doi:10.1039/d3cp04595a), 2024-01-01
Supplement: d3cp04595a1.pdf [file d3cp04595a1.pdf]

## Supporting Information

# External Electric Field Driven Configurations Transition between Lithium Salt and Electride-like Molecule: Intriguing NLO Switches in Li@Corannulene

Ping-yao Gan,<sup>a</sup> Xiao Huang,<sup>a</sup> Wen-bo Liu,<sup>a</sup> Feng-wei Gao,<sup>\*ab</sup> Zhong-min Su<sup>bc</sup>

<sup>a</sup> Chongqing Research Institute, Changchun University of Science and Technology, No.618 Liangjiang Avenue, Longxing Town, Yubei District, Chongqing City 401135, China.

<sup>b</sup> School of Chemistry and Environmental Engineering, Changchun University of Science and Technology, 7989 Weixing Road, Changchun 130012, China.

E-mail: gaofw@cust.edu.cn

<sup>c</sup> State Key Laboratory of Supramolecular Structure and Materials, Institute of Theoretical Chemistry, College of Chemistry, Jilin University, Changchun 130021, China.

### Table of contents

|                                                                                                                                                                                        |   |
|----------------------------------------------------------------------------------------------------------------------------------------------------------------------------------------|---|
| <b>Figure S1.</b> Evolutions of the vertical ionisation energy (VIE) value of the Li@corannulene under the vertical $F_{-z}$ ( $F_{-z} = 1 \times 10^{-4}$ , au)                       | 2 |
| <b>Figure S2.</b> Evolutions of the natural population analysis (NPA) charges of the Li@corannulene under the vertical $F_z$ ( $F_z = 1 \times 10^{-4}$ , au)                          | 3 |
| <b>Figure S3.</b> Electrostatic potential maps (ESP) of the Li@corannulene with allelic values of $\pm 2.00 e^{-2}$ au under the vertical $F_{-z}$ ( $F_{-z} = 1 \times 10^{-4}$ , au) | 4 |
| <b>Figure S4.</b> Evolutions of the frontier molecular orbitals of the Li@corannulene under the vertical $F_{-z}$ ( $F_{-z} = 1 \times 10^{-4}$ , au)                                  | 5 |
| <b>Figure S5.</b> Evolutions of the first hyperpolarizabilities ( $\beta_{\text{tot}}$ ) of Li@corannulene under the vertical $F_z$ ( $F_z = 1 \times 10^{-4}$ , au)                   | 6 |
| <b>Table S1.</b> Evolutions of the bond length alternation (BLA) of Li@corannulene under the vertical $F_z$ ( $F_z = 1 \times 10^{-4}$ , au)                                           | 7 |

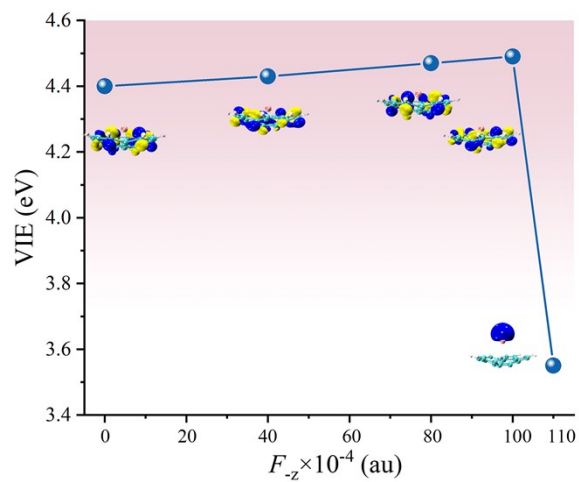

**Figure S1.** Evolutions of the vertical ionisation energy (VIE) value of the Li@corannulene under the vertical  $F_{-z}$  ( $F_{-z} = 1 \times 10^{-4}$ , au)

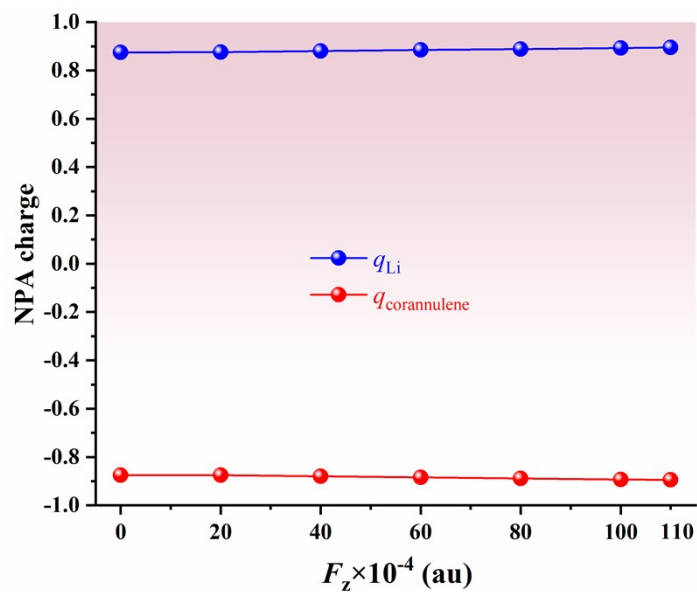

**Figure S2.** Evolutions of the natural population analysis (NPA) charges of the Li@corannulene under the vertical  $F_z$  ( $F_z = 1 \times 10^{-4}$ , au)

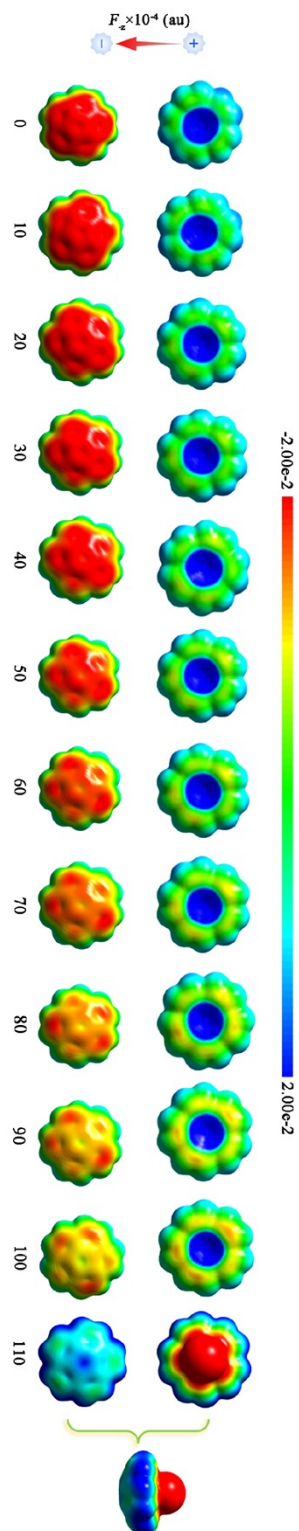

**Figure S3.** Electrostatic potential maps (ESP) of the Li@corannulene with allelic values of  $\pm 2.00 e^{-2}$  au under the vertical  $F_z$  ( $F_z = 1 \times 10^{-4}$ , au)

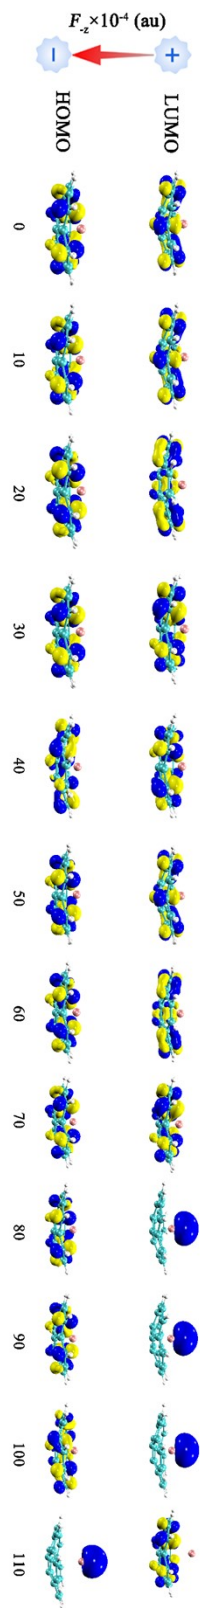

**Figure S4.** Evolutions of the frontier molecular orbitals of the Li@corannulene under the vertical  $F_z$  ( $F_z = 1 \times 10^{-4}$ , au)

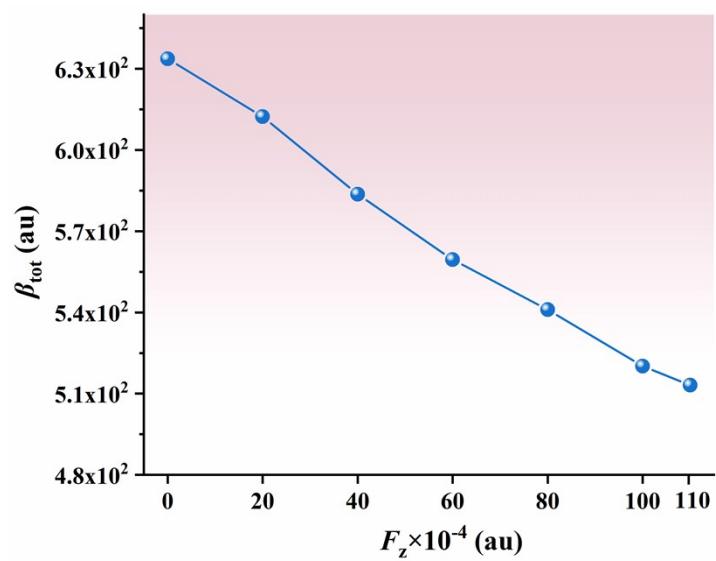

**Figure S5.** Evolutions of the first hyperpolarizabilities ( $\beta_{\text{tot}}$ ) of Li@corannulene under the vertical  $F_z$  ( $F_z = 1 \times 10^{-4}$ , au)

**Table S1.** Evolutions of the bond length alternation (BLA) of Li@corannulene under the vertical  $F_z$  ( $F_z = 1 \times 10^{-4}$ , au)

| $F_z = 1 \times 10^{-4}$ (au) | BLA (Angstrom) |
|-------------------------------|----------------|
| 0                             | 0.01           |
| 40                            | 0.01           |
| 80                            | 0.02           |
| 100                           | 0.02           |
| 110                           | 0.00           |

Cartesian Coordinates of the optimized structures ( $F_{\pm z} = 0$ , au)

| <b>Li@corannulene</b> |          | The total energy = -775.695 au |          |  |
|-----------------------|----------|--------------------------------|----------|--|
| <b>Atom</b>           | <b>X</b> | <b>Y</b>                       | <b>Z</b> |  |
| C                     | 0.83324  | -3.18907                       | -0.19262 |  |
| C                     | -0.54986 | -3.25038                       | -0.19229 |  |
| H                     | -1.02243 | -4.17466                       | -0.51877 |  |
| C                     | -1.39563 | -2.09926                       | 0.1229   |  |
| C                     | -2.7755  | -1.77794                       | -0.19262 |  |
| H                     | -3.37495 | -2.57389                       | -0.63723 |  |
| C                     | -3.26121 | -0.48148                       | -0.19229 |  |
| H                     | -4.28629 | -0.31765                       | -0.51877 |  |
| C                     | -2.42779 | 0.67862                        | 0.1229   |  |
| C                     | -2.54859 | 2.09024                        | -0.19262 |  |
| H                     | -3.49083 | 2.41439                        | -0.63723 |  |
| C                     | -1.46568 | 2.95281                        | -0.19229 |  |
| H                     | -1.62664 | 3.97834                        | -0.51877 |  |
| C                     | -0.10483 | 2.51867                        | 0.1229   |  |
| C                     | 1.20038  | 3.06978                        | -0.19262 |  |
| H                     | 1.21749  | 4.06606                        | -0.63723 |  |
| C                     | 2.35537  | 2.30641                        | -0.19229 |  |
| H                     | 3.28097  | 2.7764                         | -0.51877 |  |
| C                     | 2.363    | 0.87801                        | 0.1229   |  |
| C                     | 3.29047  | -0.19302                       | -0.19262 |  |
| H                     | 4.24328  | 0.09858                        | -0.63723 |  |
| C                     | 2.92138  | -1.52736                       | -0.19229 |  |
| H                     | 3.65439  | -2.26243                       | -0.51877 |  |
| C                     | 1.56524  | -1.97603                       | 0.1229   |  |
| C                     | 0.74706  | -0.95024                       | 0.64433  |  |
| C                     | 1.13458  | 0.41685                        | 0.64433  |  |
| C                     | -0.04585 | 1.20787                        | 0.64433  |  |
| C                     | -1.16292 | 0.32965                        | 0.64433  |  |
| C                     | -0.67288 | -1.00413                       | 0.64433  |  |
| H                     | 1.405    | -4.00514                       | -0.63723 |  |
| Li                    | 0.000    | 0.000                          | -1.17665 |  |
